# Supplementary material for: Metabolic Profiling of Bladder Cancer Patients’ Serum Reveals Their Sensitivity to Neoadjuvant Chemotherapy
Source: MDPI journal article supplement (doi:10.3390/metabo12060558), 2022-06-17
Supplement: s1 [file s1]

Table S1 Gradient elution table of UPLC-MS

| t/min | A/% | B/% |
|-------|-----|-----|
| 0     | 5   | 95  |
| 6     | 30  | 70  |
| 7     | 35  | 65  |
| 10    | 60  | 40  |
| 10.1  | 5   | 95  |
| 15    | 5   | 95  |

Table S2 Metabolites corresponding to each violin diagram.

|                     |                           |
|---------------------|---------------------------|
| ID02315_9.91_154.06 | L-Histidine               |
| ID01385_6.9_131.08  | Ornithine                 |
| ID06320_6.7_263.01  | L-Cystine                 |
| ID04424_3.66_215.02 | Citric acid               |
| ID05858_6.37_249.05 | gamma-Glutamylcysteine    |
| ID00863_2.8_113.03  | Uracil                    |
| ID00274_5.18_72.99  | Glyoxylic acid            |
| ID00736_6.79_104.03 | Serine                    |
| ID02077_6.14_145.05 | Hexanedioic acid          |
| ID02814_6.78_169.01 | Gallic acid               |
| ID09298_8.72_329.03 | 2,3-Dihydroxybenzoic acid |
| ID02428_1.24_157.12 | Allantoin                 |
