# Supplementary material for: Metabolic Profiling of Bladder Cancer Patients’ Serum Reveals Their Sensitivity to Neoadjuvant Chemotherapy
Source: MDPI journal article supplement (doi:10.3390/metabo12060558), 2022-06-17

Figure S1 PCA score plot of  $^1\text{H}$ -NMR. Each point is each sample. Different groups are in different colors, with circles representing the 95% confidence interval.

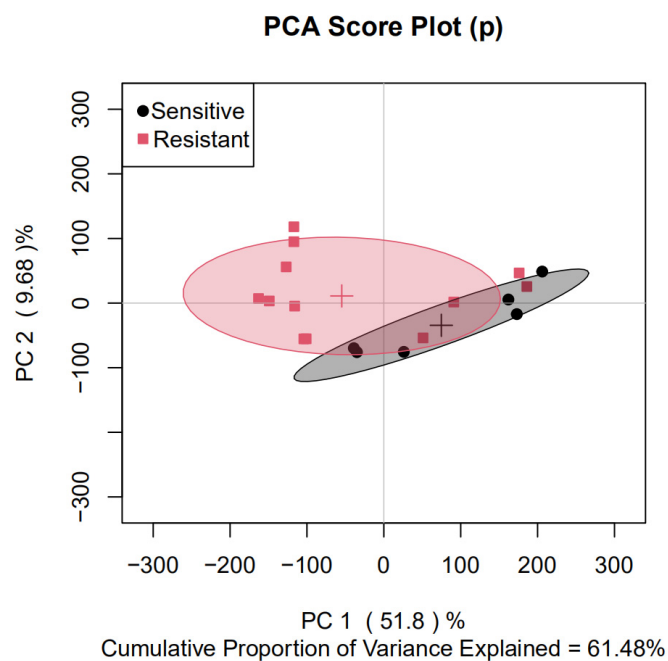

Figure S2 PCA(A) and OPLS-DA(B) analysis of the data achieved from UPLC-MS. Each point is each sample. Different groups are in different colors, with circles representing the 95% confidence interval.

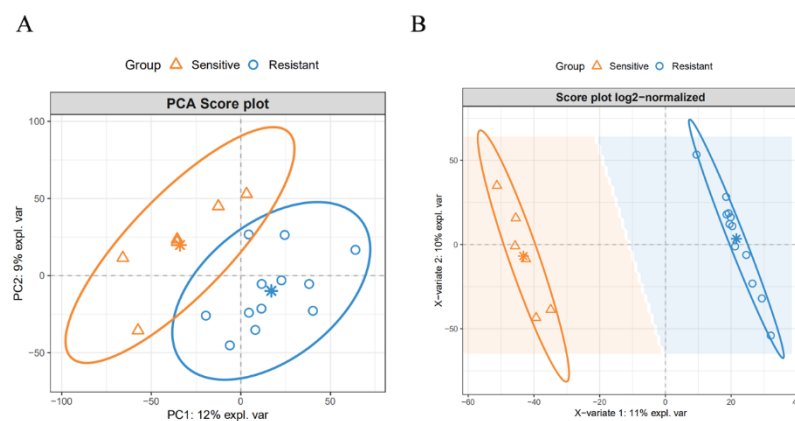

Figure S3 Other significant metabolites identified by UPLC-MS between the two groups.

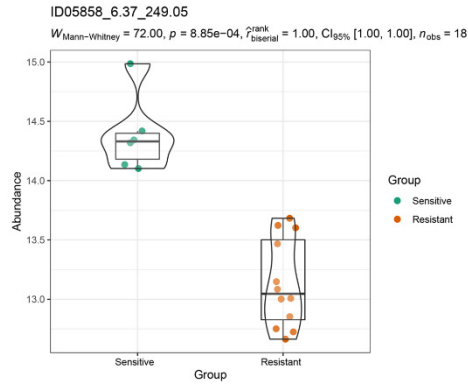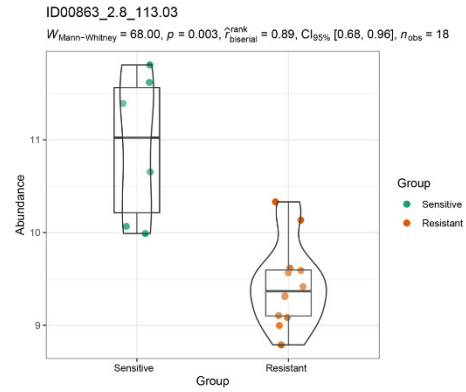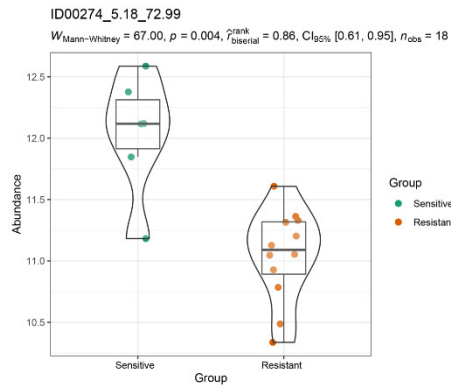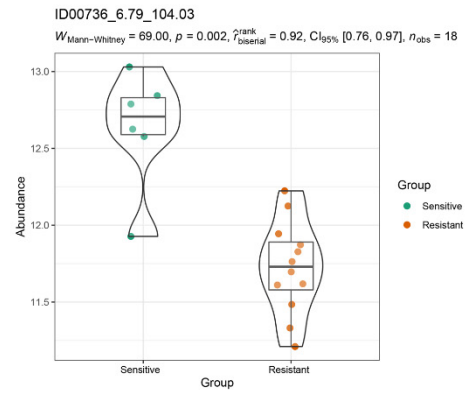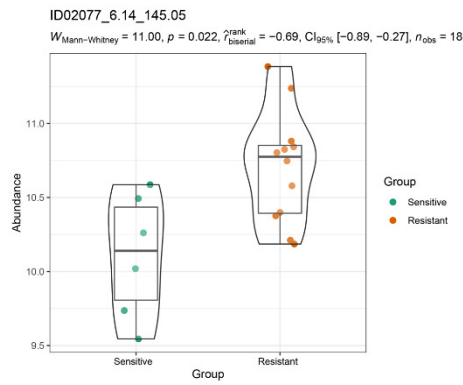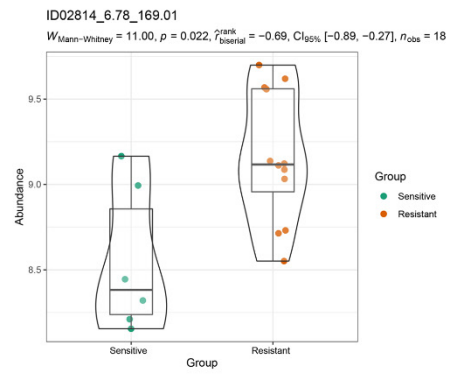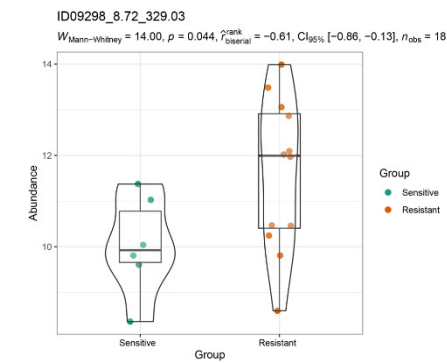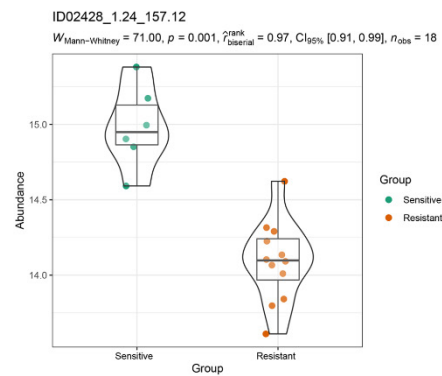

Figure S4 The genes that associated with these pathways and metabolites. Red represents genes and green represents pathways.

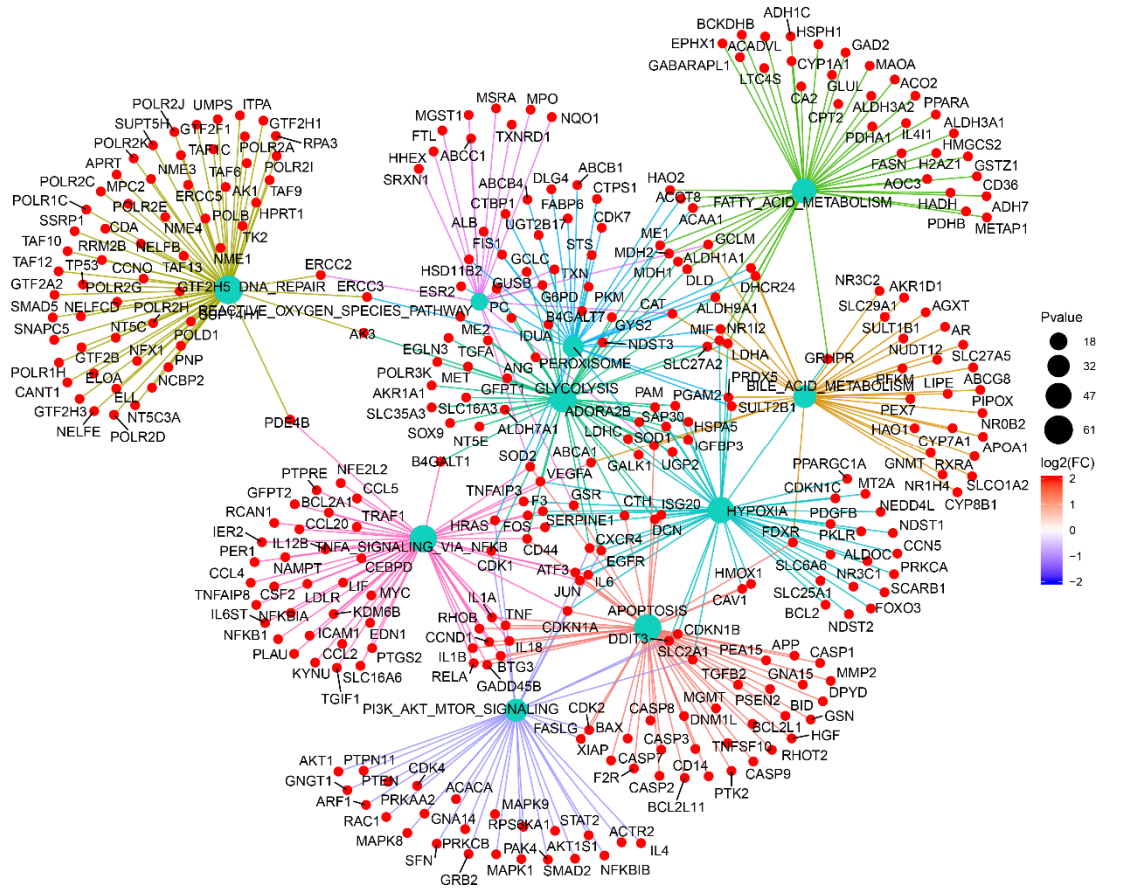

Supplement: s1 [file s1]
